# Supplementary material for: Evaluating Teaching Effectiveness of Medical Humanities in an Integrated Clerkship Program by a Novel Prospective Propensity Score Matching Framework
Source: MDPI journal article supplement (doi:10.3390/ijerph19031882), 2022-02-08
Supplement: s1 [file s1]

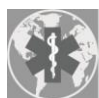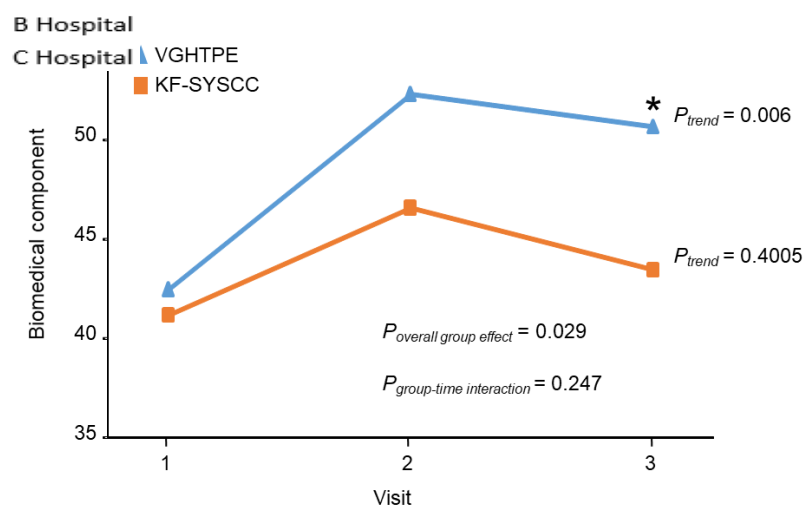

Supplementary Figure S1. TOMS

**Figure S1.** The comparison of TOMS biomedical score between at baseline, at the completion of 3-month clerkship in medicine or surgery, and at the end of the 9-month clerkship program.
